# Supplementary material for: Evaluating the Effects of an Organic Extract from the Mediterranean Sponge Geodia cydonium on Human Breast Cancer Cell Lines
Source: MDPI journal article supplement (doi:10.3390/ijms18102112), 2017-10-09
Supplement: s1 [file s1]

# **Evaluating the effects of an organic extract from the Mediterranean sponge Geodia cydonium on human breast cancer cell lines**

**Susan Costantini<sup>1</sup>, Eliana Guerriero<sup>1</sup>, Roberta Teta<sup>2</sup>, Francesca Capone<sup>1</sup>, Alessia Caso<sup>2</sup>,  
Angela Sorice<sup>1</sup>, Giovanna Romano<sup>3</sup>, Adrianna Ianora<sup>3</sup>, Nadia Ruocco<sup>4,5,6</sup>, Alfredo Budillon<sup>1</sup>,  
Valeria Costantino<sup>2</sup>, Maria Costantini<sup>4</sup>**

*<sup>1</sup>SC Farmacologia Sperimentale - Istituto Nazionale per lo Studio e la cura dei Tumori  
“Fondazione G. Pascale”, IRCCS, 80131 Napoli, Italy*

*<sup>2</sup> Department of Pharmacy, University of Naples Federico II, Via Domenico Montesano, 49 80131  
Naples, Italy*

*<sup>3</sup>Department of Integrative Marine Ecology, Stazione Zoologica Anton Dohrn, Villa Comunale,  
80121 Napoli, Italy*

*<sup>4</sup>Department of Biology and Evolution of Marine Organisms, Stazione Zoologica Anton Dohrn,  
Villa Comunale, 80121 Napoli, Italy*

*<sup>5</sup>Department of Biology, University of Naples Federico II, Complesso Universitario di Monte  
Sant'Angelo, Via Cinthia, 80126, Napoli, Italy*

*<sup>6</sup>Bio-Organic Chemistry Unit, Institute of Biomolecular Chemistry-CNR, Via Campi Flegrei 34,  
Pozzuoli, Naples 80078, Italy*

**Table S1.** List of metabolic pathways in which the significant metabolites in the polar phases of three breast cancer cell lines are involved

| Pathway                                    | Molecules                              |
|--------------------------------------------|----------------------------------------|
| <i>Common between three cell lines</i>     |                                        |
| Glycolysis and Gluconeogenesis             | Lactate, alpha-glucose, beta-glucose   |
| Glycerophospholipidmetabolism              | Choline and glycerophosphocholine      |
| Glutamine and glutamatemetabolism          | glutamine and glutamate                |
|                                            |                                        |
| <i>Specific in MCF-7</i>                   |                                        |
| Aminoacyl-tRNAbiosynthesis                 | glutamine and proline                  |
|                                            |                                        |
| <i>Specific in MDA-MB231</i>               |                                        |
| Glycine, Serine, Threoninemetabolism       | Choline, Glycine, Threonine            |
| Nitrogenmetabolism                         | Glutamine, Glycine                     |
| Aminoacyl-tRNAbiosynthesis                 | Glutamine, Glycine, Threonine          |
|                                            |                                        |
| <i>Specific in MDA-MB468</i>               |                                        |
| Aminoacyl-tRNAbiosynthesis                 | Glutamine, Glycine, Lysine, Asparagine |
| Nitrogenmetabolism                         | Glutamine, Glycine, Asparagine         |
| Cyanoamido acid metabolism                 | Glutamine, Glycine, Asparagine         |
| Alanine, aspartate and glutamatemetabolism | Glutamine, Asparagine                  |
| Lysinedegradation                          | Glycine, Lysine                        |

**Fig S1**

**a**

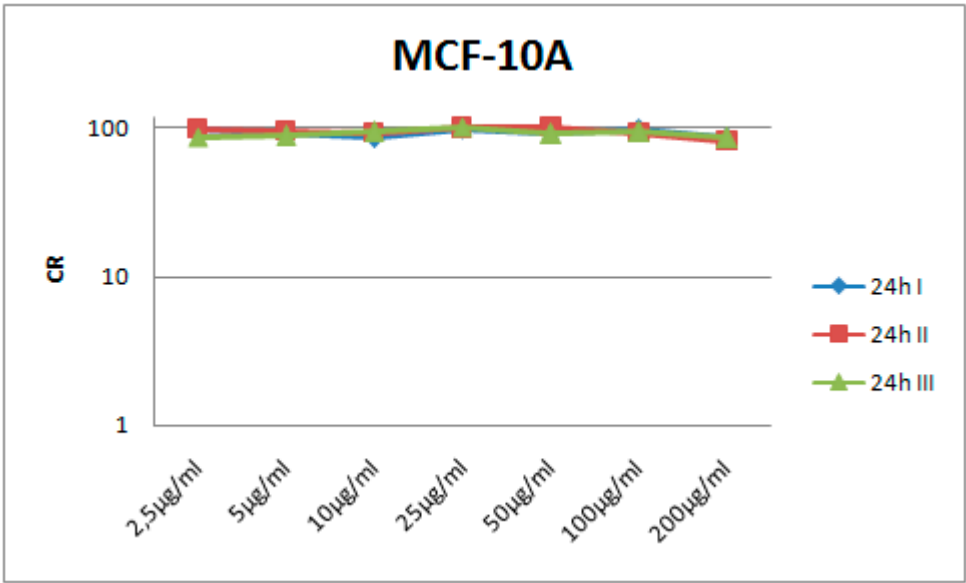

**b**

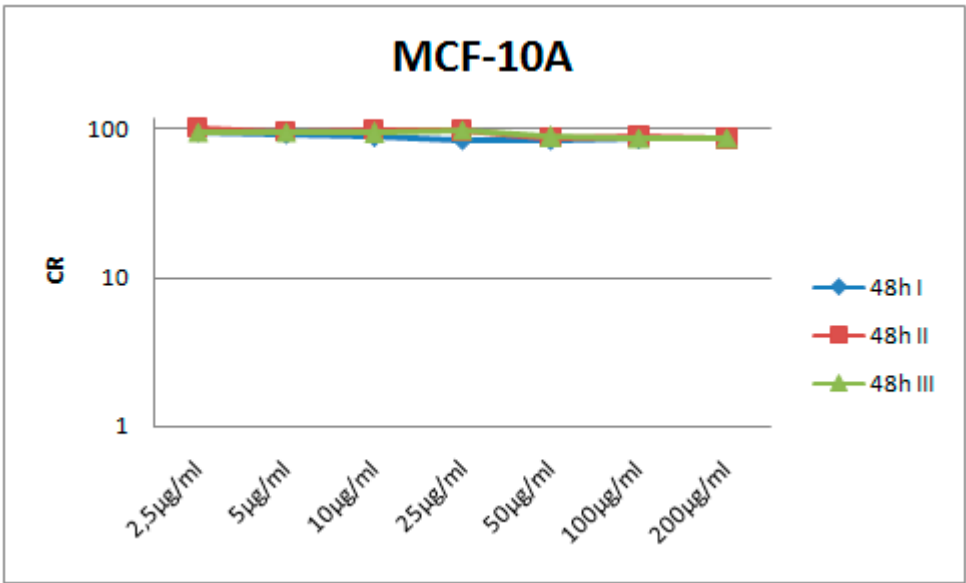

**Fig S1.** Cell viability (CR) related to normal breast cells, MCF-10A, after the treatment with three sponge sub-fractions named 1, 2 and 3 for (a) 24 and (b) 48 h.

Fig S2

a

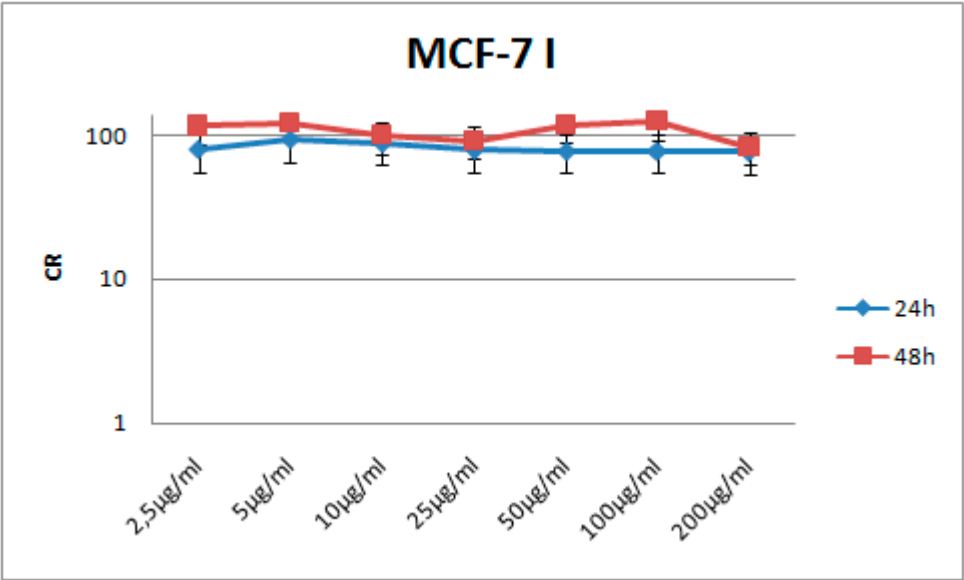

b

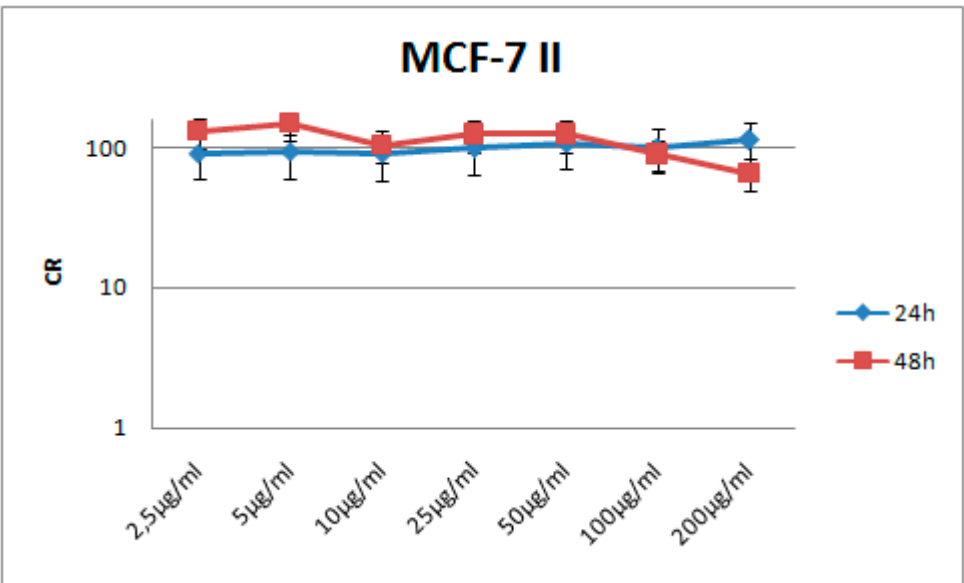

**Fig S2.** Cell viability (CR) related to breast cancer cells, MCF-7, after the treatment with two sponge sub-fractions named 1 (a) and 2 (b)for 24 and 48 h.

**Fig S3**

**a**

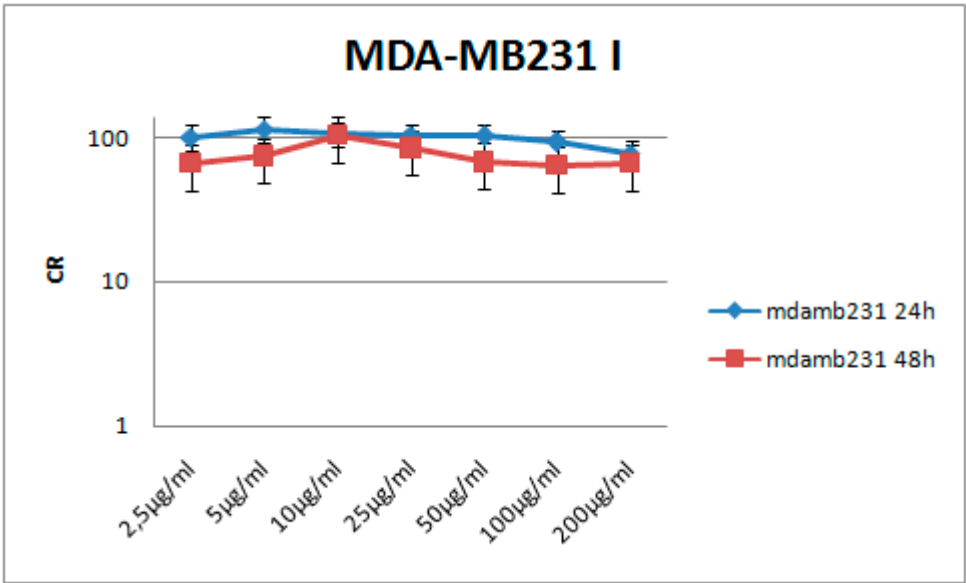

**b**

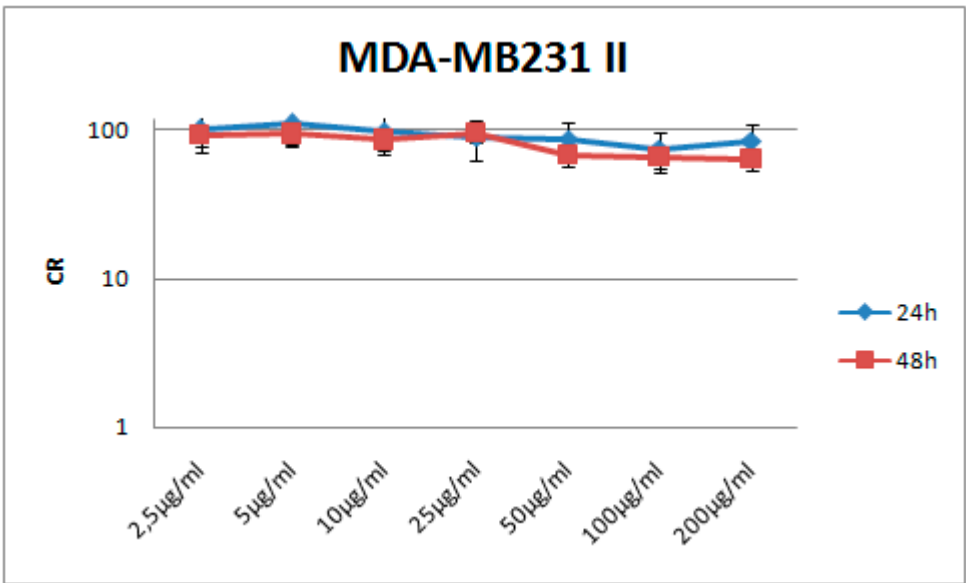

**Fig S3.** Cell viability (CR) related to breast cancer cells, MDA-MB231, after the treatment with two sponge sub-fractions named 1 (a) and 2 (b) for 24 and 48 h.

**Fig S4**

**a**

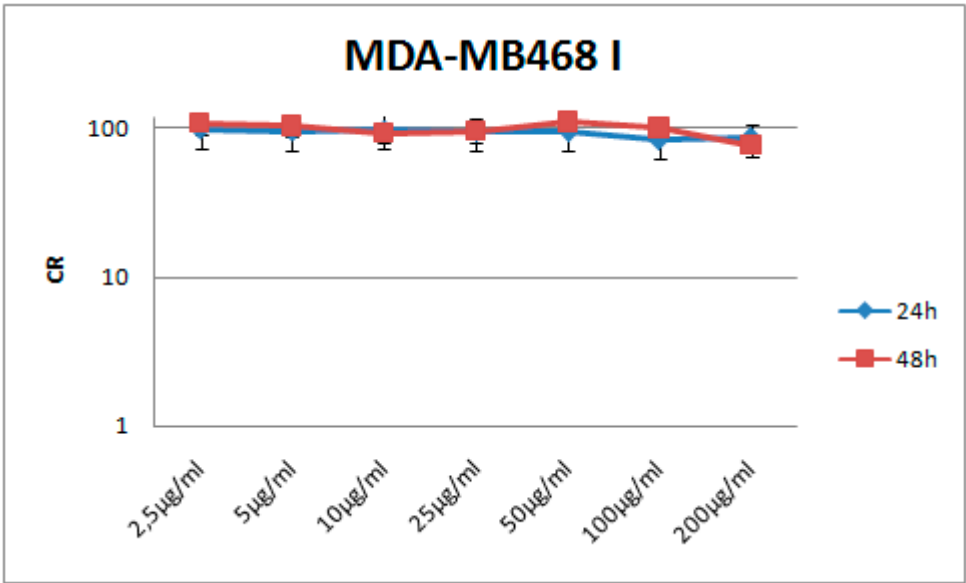

**b**

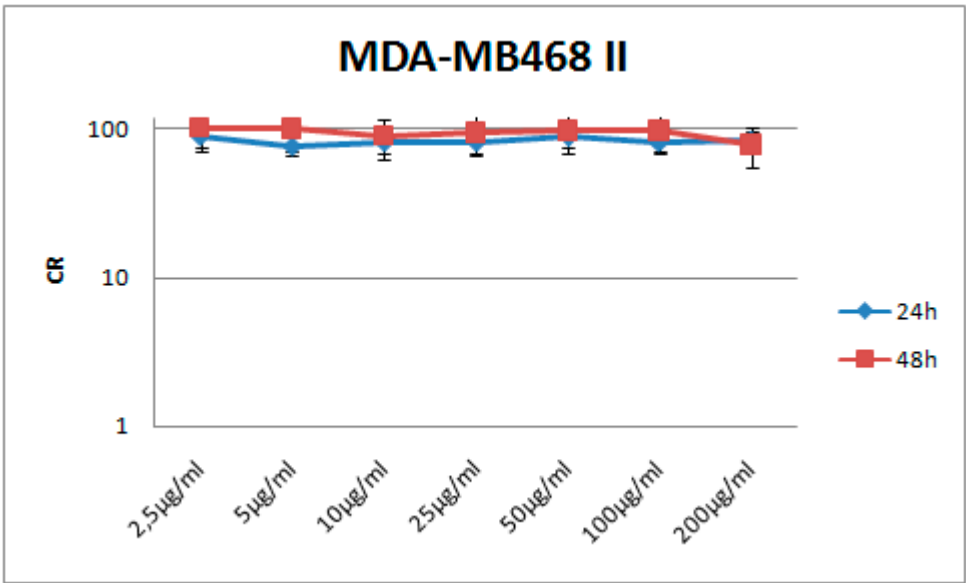

**Fig S4.** Cell viability (CR) related to breast cancer cells, MDA-MB468, after the treatment with two sponge sub-fractions named 1 (a) and 2 (b) for 24 and 48 h
